# Supplementary material for: Regulatory context drives conservation of glycine riboswitch aptamers
Source: PLoS Comput Biol. 2019 Dec 20;15(12):e1007564. doi: 10.1371/journal.pcbi.1007564 (PMC6944388; doi:10.1371/journal.pcbi.1007564)
Supplement: S12 Table — (XLSX) [file pcbi.1007564.s028.xlsx]

## Sheet: S12 Table
S12 Table: 50 Actinobacteria riboswitch aptamer sequences from aptamer-1 and singleton type-1 sub-cluster with paired aptamer-2 supplemented.
NC_014814/2829309-2829397(-)/Actinobacteria/Mycobacterium_gilvum/singlet_2/GCV
NC_015564/3208671-3208754(-)/Actinobacteria/Hoyosella_subflava/apt_A/GCV
NC_015564/3208553-3208662(-)/Actinobacteria/Hoyosella_subflava/apt_B/GCV
NC_015576/2096336-2096419(+)/Actinobacteria/Mycobacterium_sinense/singlet_0/GCV
NC_015758/2074938-2075021(+)/Actinobacteria/Mycobacterium_africanum/singlet_1/GCV
NC_015848/2114061-2114144(+)/Actinobacteria/Mycobacterium_canettii/singlet_1/GCV
NC_016604/4876162-4876248(+)/Actinobacteria/Mycobacterium_rhodesiae/apt_A/GCV
NC_016604/4876258-4876345(+)/Actinobacteria/Mycobacterium_rhodesiae/apt_B/GCV
NC_016946/2833102-2833189(-)/Actinobacteria/Mycobacterium_intracellulare/apt_A/GCV
NC_016946/2832986-2833093(-)/Actinobacteria/Mycobacterium_intracellulare/apt_B/GCV
NC_017904/2863396-2863483(-)/Actinobacteria/Mycobacterium_sp/apt_A/GCV
NC_017904/2863280-2863387(-)/Actinobacteria/Mycobacterium_sp/apt_B/GCV
NC_018027/2851539-2851625(+)/Actinobacteria/Mycobacterium_chubuense/singlet_0/GCV
NC_018150/2505536-2505623(-)/Actinobacteria/Mycobacterium_abscessus/singlet_1/GCV
NC_018612/2880619-2880706(+)/Actinobacteria/Mycobacterium_indicus/apt_A/GCV
NC_018612/2880721-2880827(+)/Actinobacteria/Mycobacterium_indicus/apt_B/GCV
NC_019952/2153368-2153455(+)/Actinobacteria/Mycobacterium_canettii/apt_A/GCV
NC_019952/2153469-2153574(+)/Actinobacteria/Mycobacterium_canettii/apt_B/GCV
NC_019966/3204883-3204969(+)/Actinobacteria/Mycobacterium_sp/singlet_1/GCV
NC_020133/2648630-2648717(+)/Actinobacteria/Mycobacterium_liflandii/apt_A/GCV
NC_020133/2648726-2648833(+)/Actinobacteria/Mycobacterium_liflandii/apt_B/GCV
NC_021282/2389520-2389605(+)/Actinobacteria/Mycobacterium_abscessus/singlet_1/GCV
NC_021715/2685464-2685551(-)/Actinobacteria/Mycobacterium_yongonense/apt_A/GCV
NC_021715/2685348-2685455(-)/Actinobacteria/Mycobacterium_yongonense/apt_B/GCV
NC_022663/88743-88830(+)/Actinobacteria/Mycobacterium_kansasii/apt_A/GCV
NC_022663/88846-88947(+)/Actinobacteria/Mycobacterium_kansasii/apt_B/GCV
NC_023036/3313374-3313459(-)/Actinobacteria/Mycobacterium_neoaurum/apt_A/GCV
NC_023036/3313278-3313364(-)/Actinobacteria/Mycobacterium_neoaurum/apt_B/GCV
NZ_AP012555/2644236-2644323(+)/Actinobacteria/Mycobacterium_avium/singlet_1/GCV
NZ_CP007220/2402285-2402368(+)/Actinobacteria/Mycobacterium_chelonae/singlet_0/GCV
NZ_CP009914/3460267-3460356(-)/Actinobacteria/Mycobacterium_sp/apt_A/GCV
NZ_CP009914/3460170-3460258(-)/Actinobacteria/Mycobacterium_sp/apt_B/GCV
NZ_CP010071/2241405-2241492(+)/Actinobacteria/Mycobacterium_sp/apt_A/GCV
NZ_CP010071/2241501-2241631(+)/Actinobacteria/Mycobacterium_sp/apt_B/GCV
NZ_CP010797/953856-953941(+)/Actinobacteria/Rhodococcus_sp/singlet_1/GCV
NZ_CP010996/248126-248209(+)/Actinobacteria/Mycobacterium_simiae/singlet_2/GCV
NZ_CP011022/3313373-3313458(-)/Actinobacteria/Mycobacterium_sp/apt_A/GCV
NZ_CP011022/3313277-3313363(-)/Actinobacteria/Mycobacterium_sp/apt_B/GCV
NZ_CP011269/3459660-3459749(-)/Actinobacteria/Mycobacterium_fortuitum/apt_A/GCV
NZ_CP011269/3459563-3459651(-)/Actinobacteria/Mycobacterium_fortuitum/apt_B/GCV
NZ_CP011530/2625418-2625503(+)/Actinobacteria/Mycobacterium_immunogenum/singlet_1/GCV
NZ_CP011773/3545398-3545483(-)/Actinobacteria/Mycobacterium_sp/singlet_0/GCV
NZ_CP011883/2241095-2241182(+)/Actinobacteria/Mycobacterium_haemophilum/singlet_0/GCV
NZ_CP012150/4632892-4632976(+)/Actinobacteria/Mycobacterium_goodii/apt_A/GCV
NZ_CP012150/4632987-4633087(+)/Actinobacteria/Mycobacterium_goodii/apt_B/GCV
NZ_CP014475/2420198-2420285(+)/Actinobacteria/Mycobacterium_phlei/apt_A/GCV
NZ_CP014475/2420294-2420399(+)/Actinobacteria/Mycobacterium_phlei/apt_B/GCV
NZ_CP014950/2273716-2273801(+)/Actinobacteria/Mycobacterium_abscessus/singlet_1/GCV
NZ_CP015220/4301108-4301195(-)/Actinobacteria/Rhodococcus_sp/singlet_1/GCV
NZ_CP015235/4373127-4373212(+)/Actinobacteria/Rhodococcus_fascians/singlet_1/GCV
